# Supplementary material for: The Narrowed Internal Auditory Canal: A Distinct Etiology of Pediatric Vestibular Paroxysmia
Source: MDPI journal article supplement (doi:10.3390/jcm11154300), 2022-07-25

## Supplementary Data

HRCT of temporal bones (IAC sections), for the right and left ear, in both axial and coronal plans of Group I patients (1 to 8). A: Right ear, axial plane, B: Left ear, axial plane, C: Right ear, coronal plane, and D: Left ear, coronal plane.

Note that these figures show uni- or bilateral narrowing of the IAC. Narrowing can be visualized in both axial and/or coronal plans, more pronounced in the coronal plans suggesting a developmental process.

1:

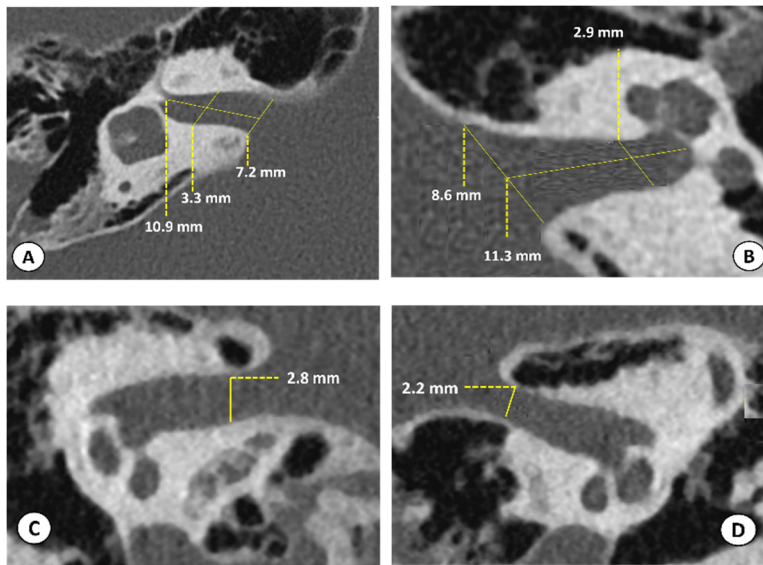

2:

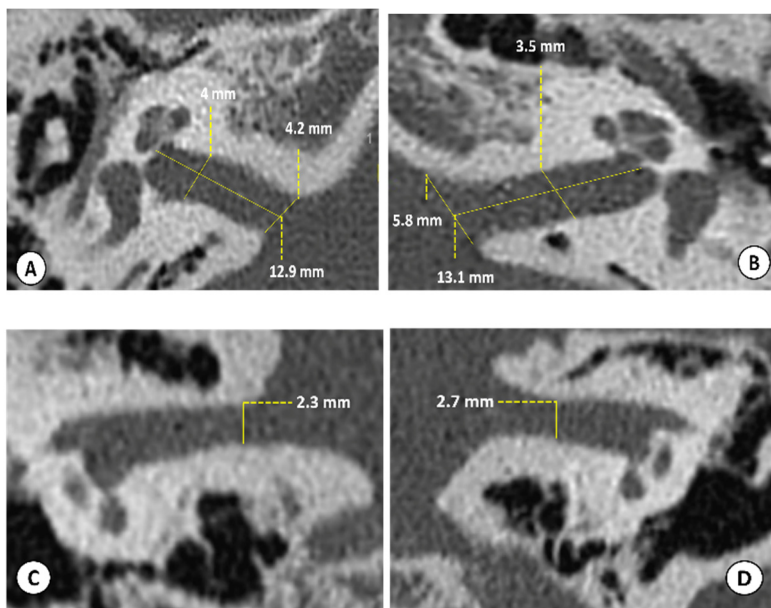

3:

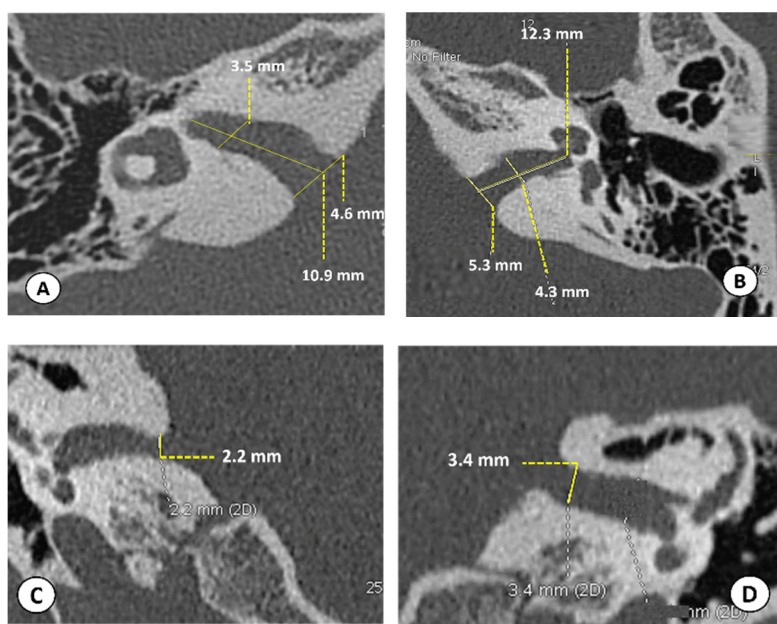

4:

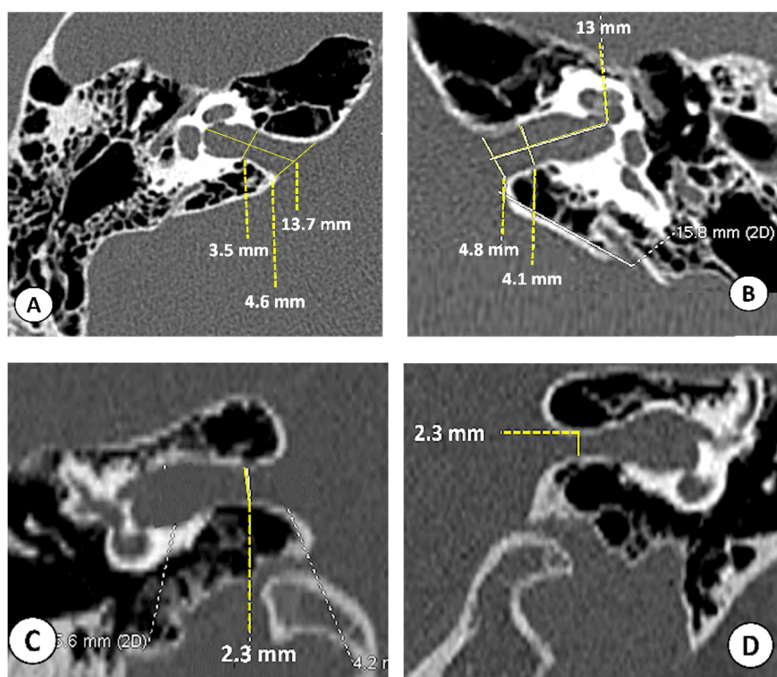

5:

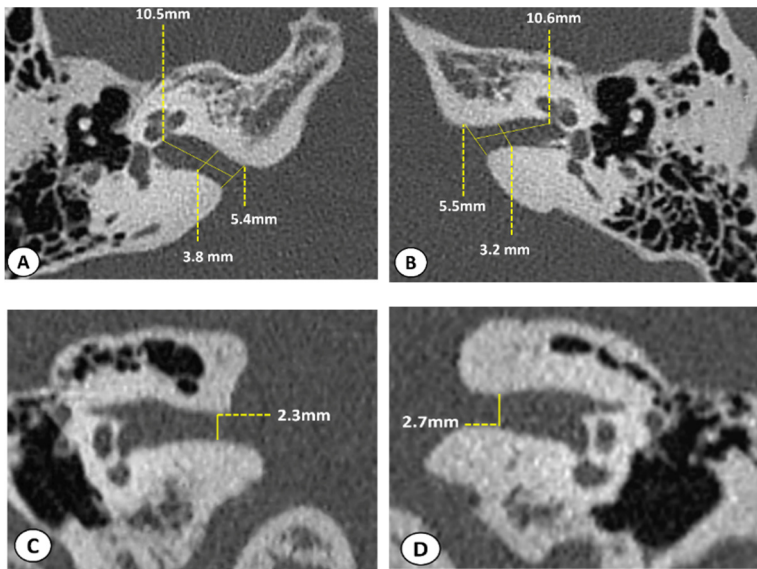

6:

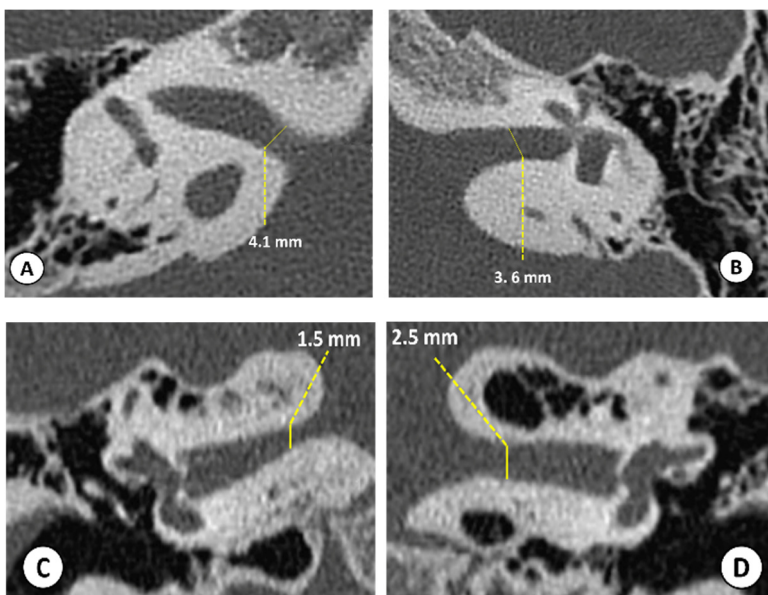

7:

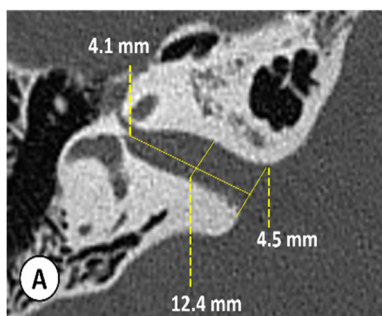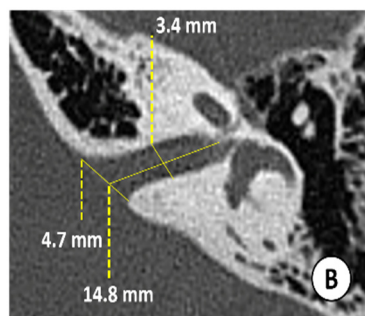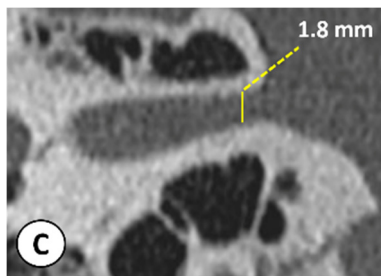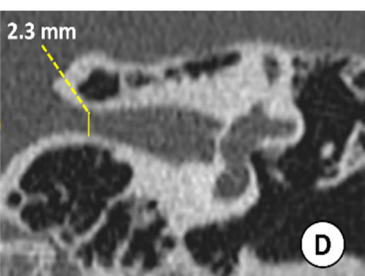

8:

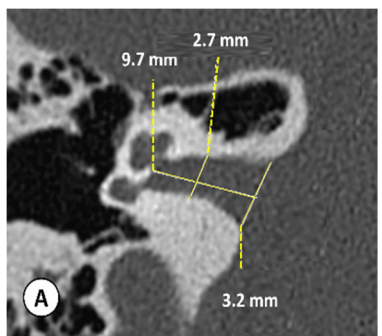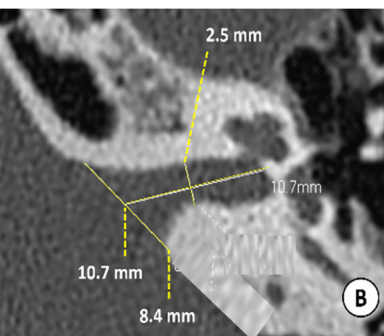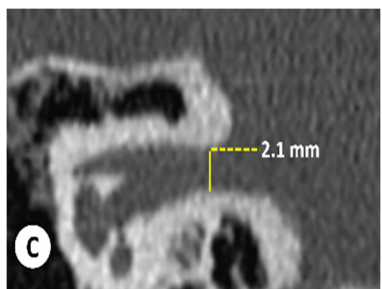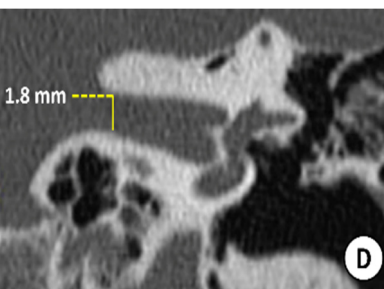

Supplement: s1 [file s1]
